# Supplementary material for: Formation of secondary organic aerosols from the ozonolysis of dihydrofurans
Source: Copernicus journal article supplement (doi:10.5194/acp-17-2347-2017), 2017-02-14
Supplement: Supplementary file 1 [file acp-17-2347-2017-supplement.pdf]

Supplement of Atmos. Chem. Phys., 17, 2347–2357, 2017  
<http://www.atmos-chem-phys.net/17/2347/2017/>  
doi:10.5194/acp-17-2347-2017-supplement  
© Author(s) 2017. CC Attribution 3.0 License.

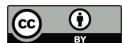

*Supplement of*

## **Formation of secondary organic aerosols from the ozonolysis of dihydrofurans**

**Yolanda Diaz-de-Mera et al.**

*Correspondence to:* Alfonso Aranda ([alfonso.aranda@uclm.es](mailto:alfonso.aranda@uclm.es))

The copyright of individual parts of the supplement might differ from the CC-BY 3.0 licence.

## Water vapour concentration for experiments with dried air samples.

A series of experiments was conducted to estimate the water concentration under “dry conditions”. We have used a degassed sample of solid sulfur trioxide (>99%, stabilized, Aldrich) contained in a glass flask to obtain different SO<sub>3</sub> concentrations in the reactor (as it was done in previous studies (Jayne, 1997)). Freshly dried synthetic air from a liquid nitrogen trap was mixed with SO<sub>3</sub> in the teflon reactor and the mixture was continuously monitored by the CPC for 40 minutes. Fig. S1 shows the results for experiments with SO<sub>3</sub> concentration in the range 1 to 12ppb. No particles could be observed for experiments with low initial SO<sub>3</sub> concentrations. On the other hand, NPF (new particle formation) was observed for the experiments with SO<sub>3</sub> in the range 6 to 12 ppb. Under these experimental conditions, nucleation is attributed to the formation of H<sub>2</sub>SO<sub>4</sub> from the reaction of SO<sub>3</sub> and the residual H<sub>2</sub>O.

The overall gas-phase reaction  $\text{H}_2\text{O} + \text{SO}_3 \rightarrow \text{H}_2\text{SO}_4$  exhibits a second-order dependence on water vapor concentration, the first-order rate coefficient for the SO<sub>3</sub> loss being  $k = 3.90 \times 10^{-41} \exp(6830.6/T) [\text{H}_2\text{O}]^2$  (Jayne, 1997)

Taking into account that the approximate H<sub>2</sub>SO<sub>4</sub> gas phase concentration able to nucleate is around  $5 \times 10^6 \text{ molecule cm}^{-3}$  (Metzger, 2010), the concentration of water in the reactor may be obtained by simulating the SO<sub>3</sub> and H<sub>2</sub>SO<sub>4</sub> profiles for different guessed H<sub>2</sub>O profiles. Thus for example, since no NPF was observed for the experiment with 2ppb of SO<sub>3</sub>, the expected water concentration must be below 15ppb. On the other hand from the experiment with 6ppb of SO<sub>3</sub>, a 20 ppb water concentration is required to reproduce the observed nucleation time. From all the experiments carried out, we estimate that the residual water concentration in the reactor is  $20 \pm 10 \text{ ppb}$ . To check for permeation through the reactor wall, some experiments have been also carried out with dry air after 1 hour in the reactor. The results were similar to those carried out with freshly dried air.

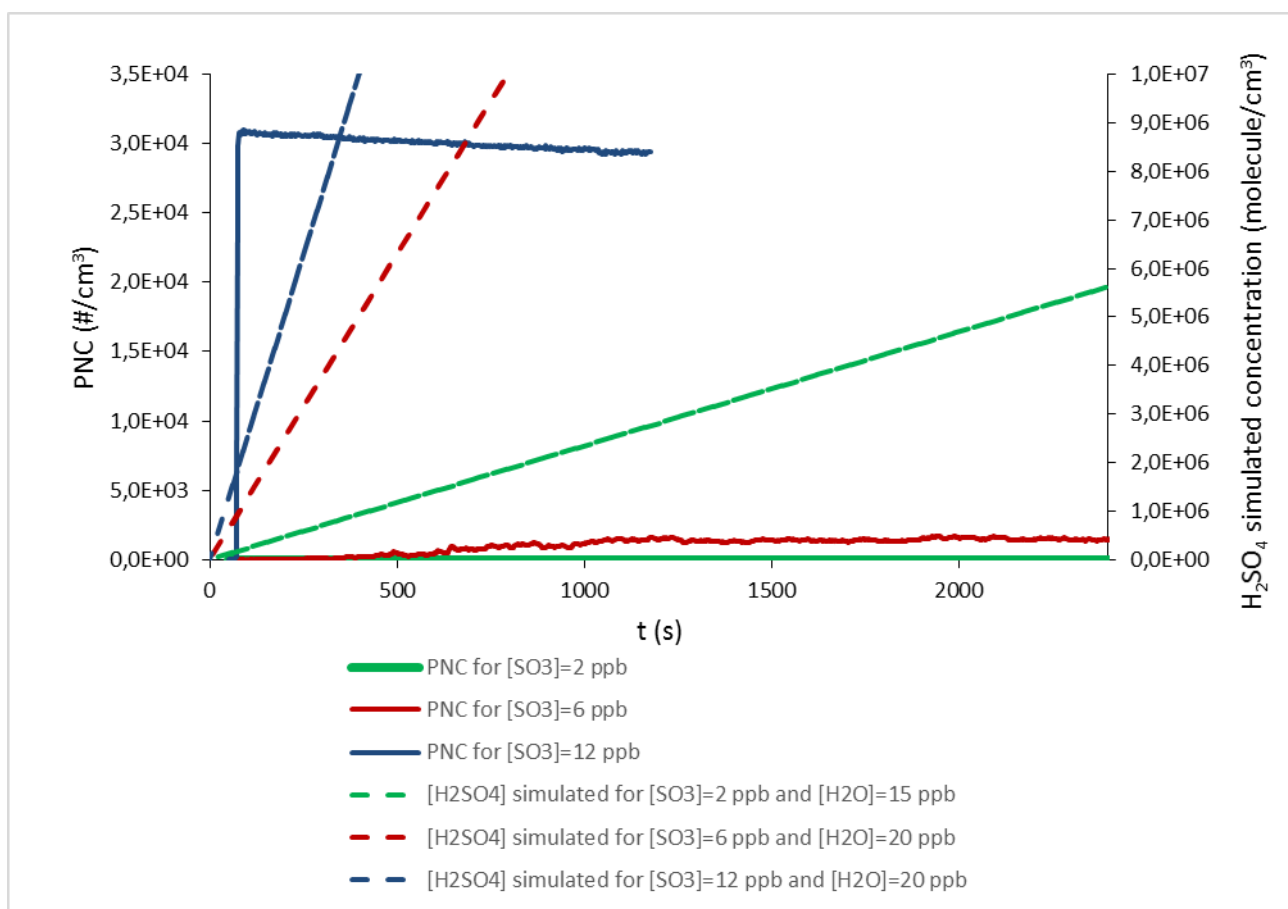

**Figure S1.** Particle number concentration for different the reaction of  $\text{SO}_3$  with residual  $\text{H}_2\text{O}$  and simulated profiles of  $\text{H}_2\text{SO}_4$  for given  $\text{SO}_3$  and  $\text{H}_2\text{O}$  concentrations.

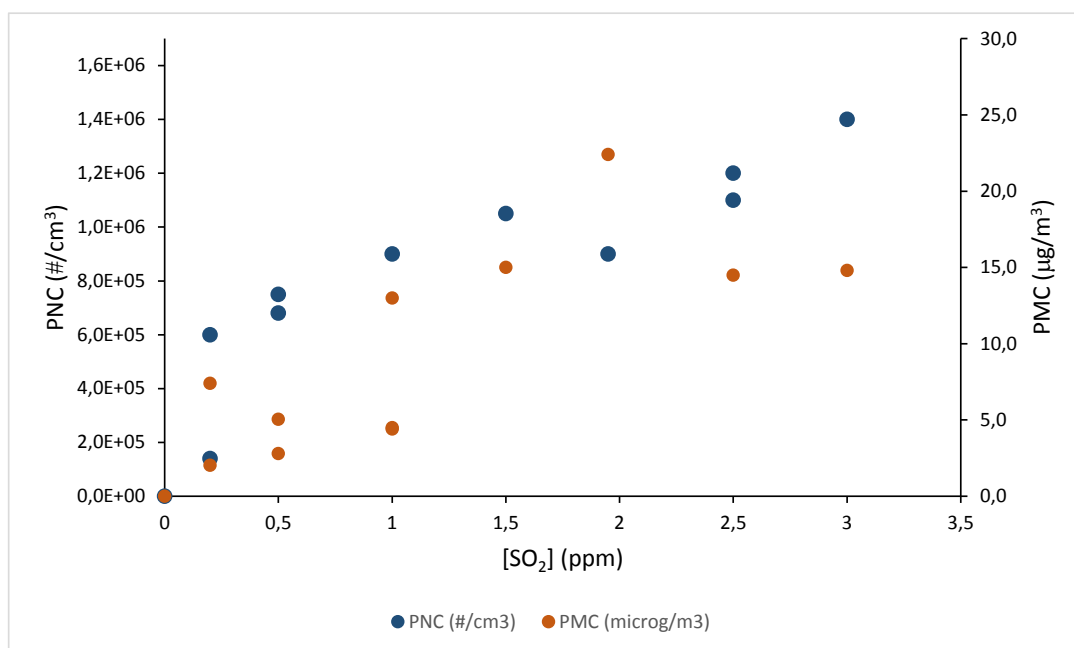

**Figure S2.** Maximum particle number concentration and maximum mass concentration in experiments with different  $\text{SO}_2$  initial concentrations. For this series of experiments, the initial concentrations of 2,5-DHF and ozone were 0.5 and 1.0 ppm respectively. Relative humidity=0.

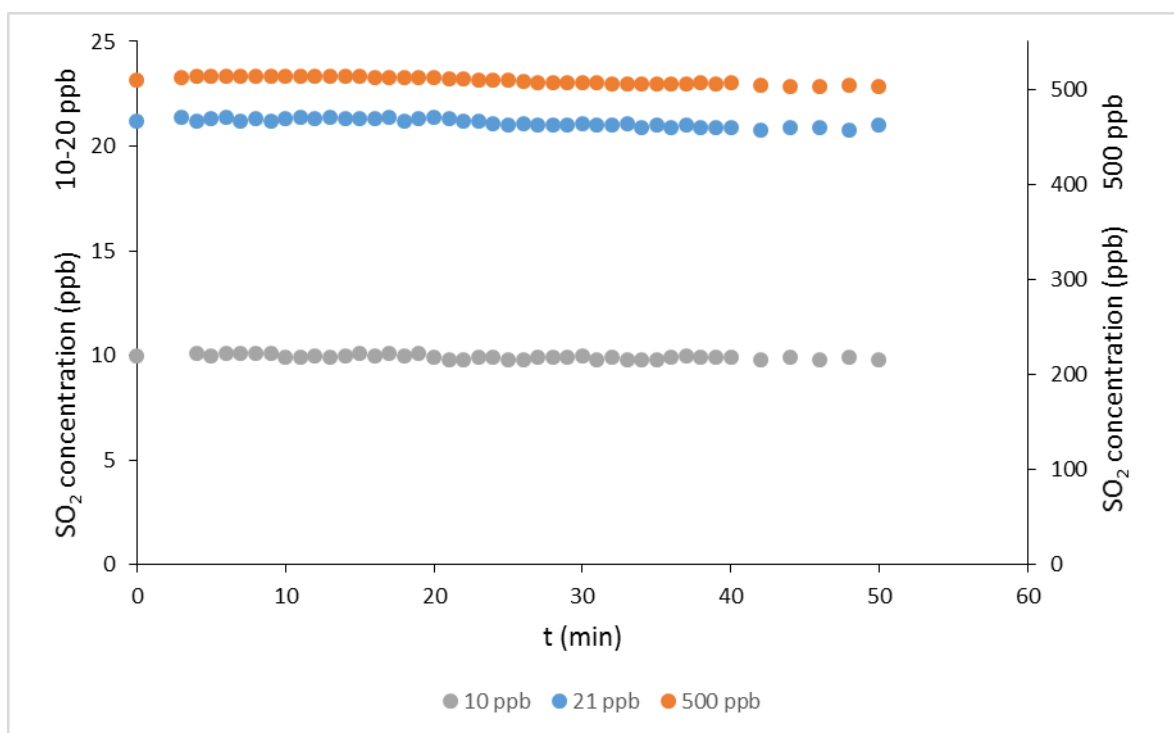

**Figure S3.**  $\text{SO}_2$  profiles during ozonolysis reactions of 2,5-DHF and ozone (0.5 and 1.0 initial concentrations, respectively) starting from different  $\text{SO}_2$  concentrations. Similar results were obtained for 2,3-DHF.

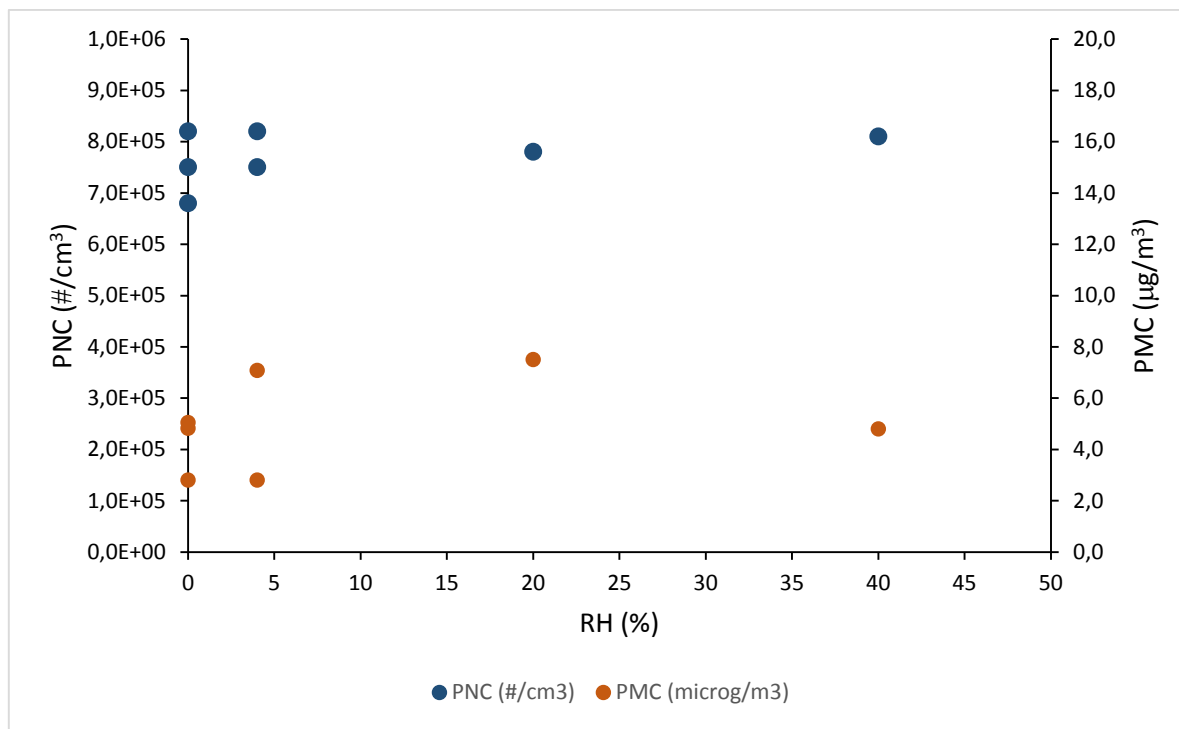

**Figure S4.** Maximum particle number concentration and maximum mass concentration in experiments carried out under different RH. For this series of experiments, the initial concentrations of 2,5-DHF, ozone and SO<sub>2</sub> were 0.5, 1.0 and 0.5 ppm respectively.

#### **Effect of ozone and 2,5-DHF initial concentrations.**

Several experiments were also carried out to find the effect of concentrations of ozone and 2,5-DHF on the production of SOA. Keeping fixed concentrations of SO<sub>2</sub> and 2,5-DHF, the increase of ozone led to increase of the particles number concentration and mass concentration, as it is shown in figure S5.

Likewise, keeping constant the SO<sub>2</sub> and ozone initial concentrations, an increase of 2,5-DHF lead to the increase of both PNC and PMC, figure S6. Both ozone and 2,5-DHF dependences suggest that their primary reaction is closely coupled to the production of particles. The acceleration of the reaction of ozone with 2,5-DHF enhances the formation of particles. In this sense, the SOA yield, defined as the ratio between the total mass concentration and the total concentration of reacted 2,5-DHF, for any experiment was linear for most of the reaction time, Figure S7.

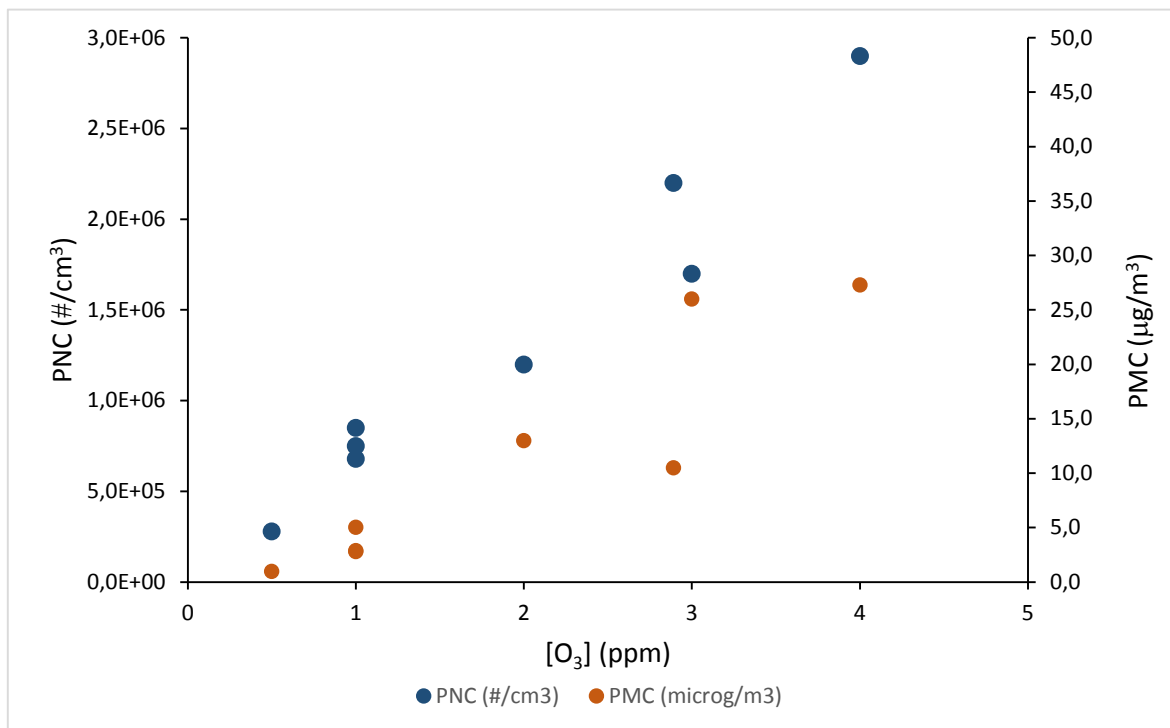

**Figure S5.** Maximum particle number concentration and maximum mass concentration in experiments carried out under different ozone concentrations. For this series of experiments, the initial concentrations of 2,5-DHF and SO<sub>2</sub> were 0.5 ppm and RH = 0.

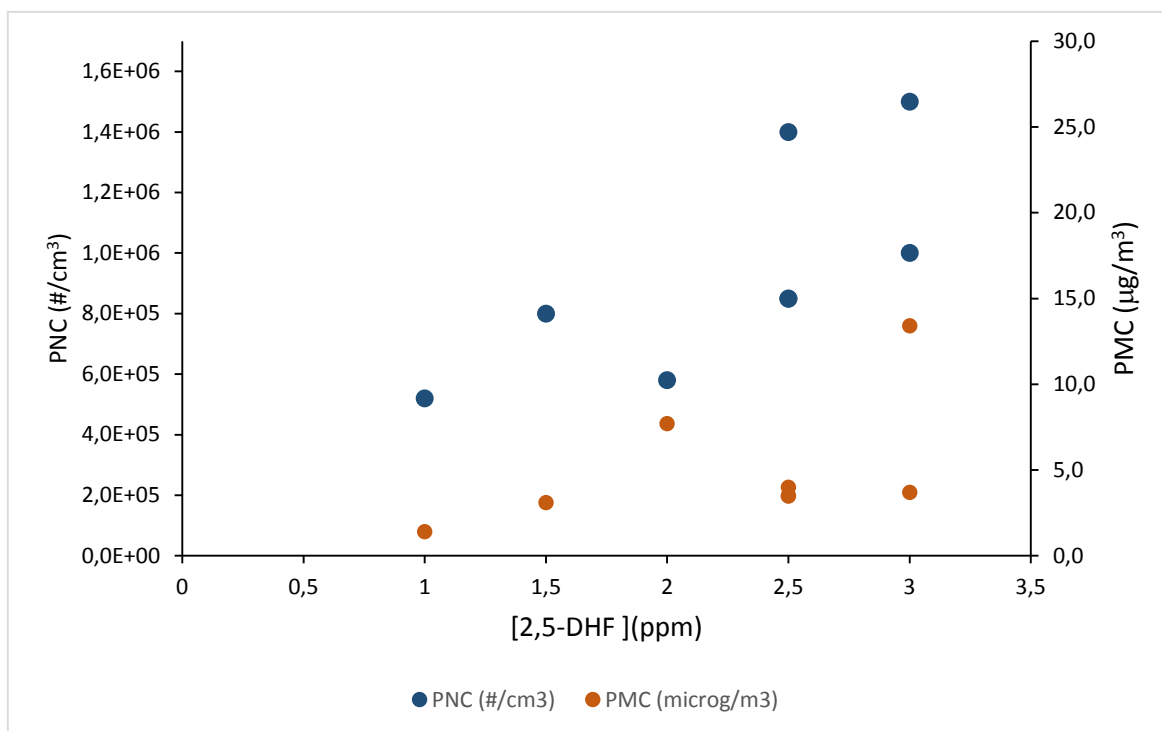

**Figure S6.** Maximum particle number concentration and maximum mass concentration in experiments carried out under different 2,5-DHF concentrations. For this series of experiments, the initial concentrations of ozone and SO<sub>2</sub> were 0.5 ppm. RH = 0.

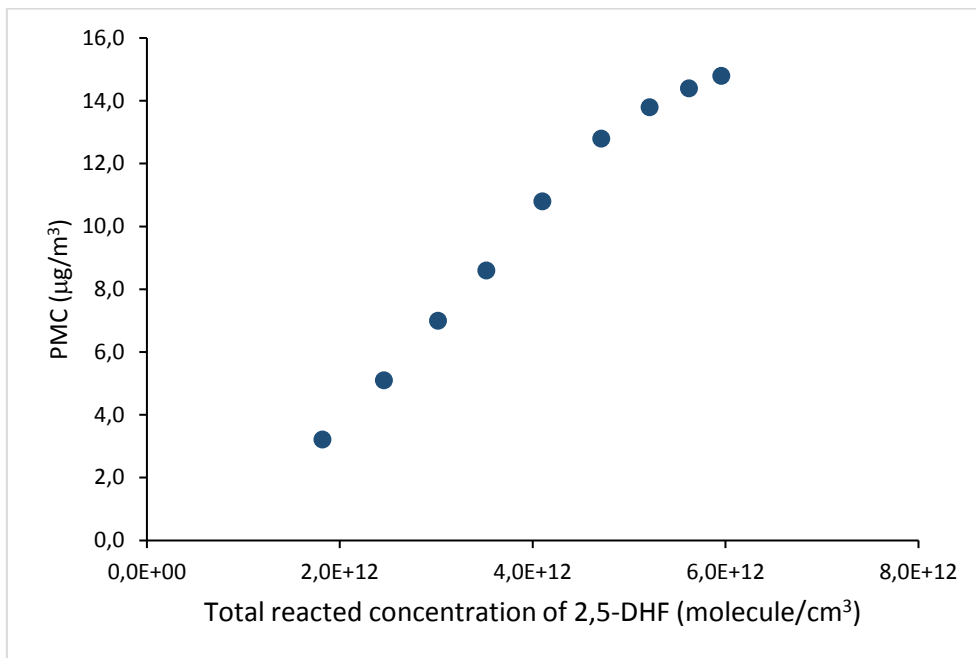

**Figure S7.** Particle mass concentration formed during a typical experiment against the total concentration of reacted 2,5-DHF.

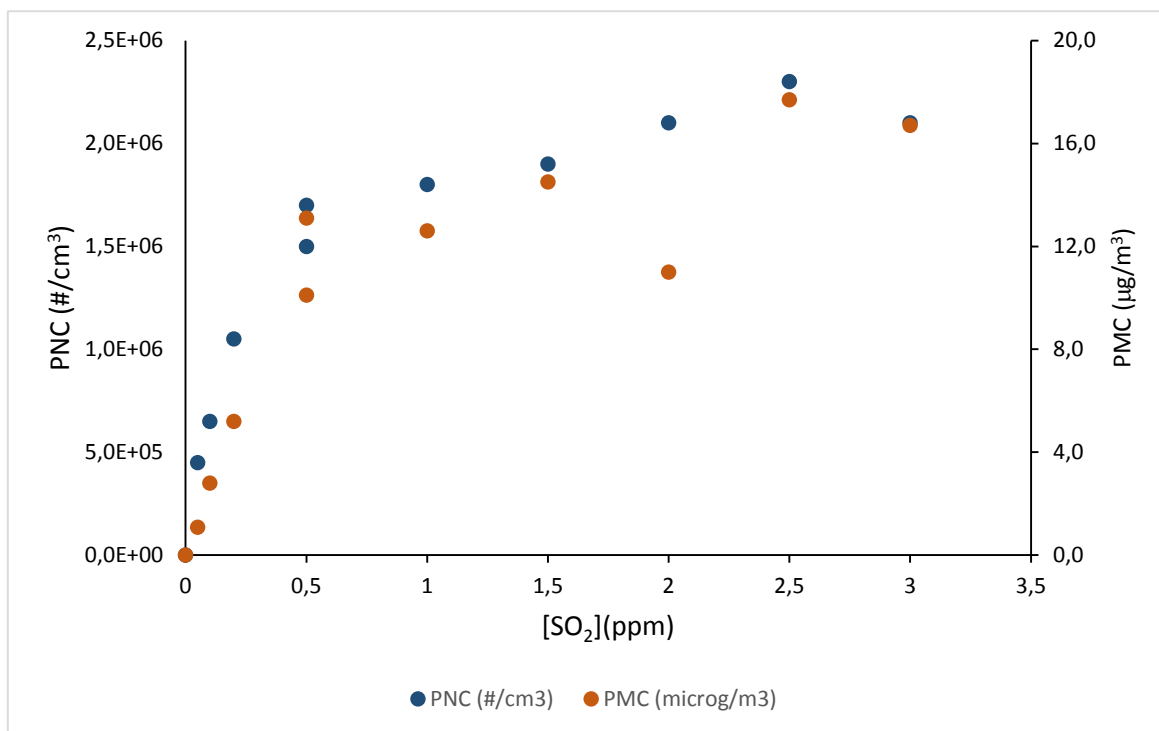

**Figure S8.** Maximum particle number concentration and maximum mass concentration in experiments with different SO<sub>2</sub> initial concentrations. For this series of experiments, the initial concentrations of 2,3-DHF and ozone were 0.5 and 1.0 ppm respectively. Relative humidity=0.

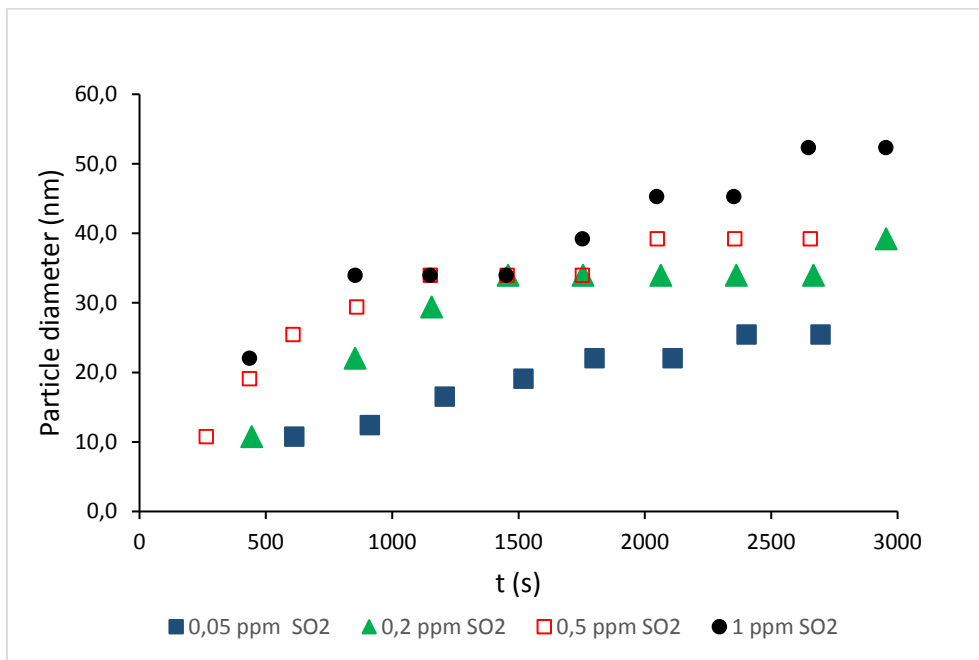

**Figure S9.** Average particles' diameters growth for some experiments with 0.5 ppm of 2,3-DHF and 1 ppm of ozone initial concentrations under dry conditions and variable SO<sub>2</sub>.

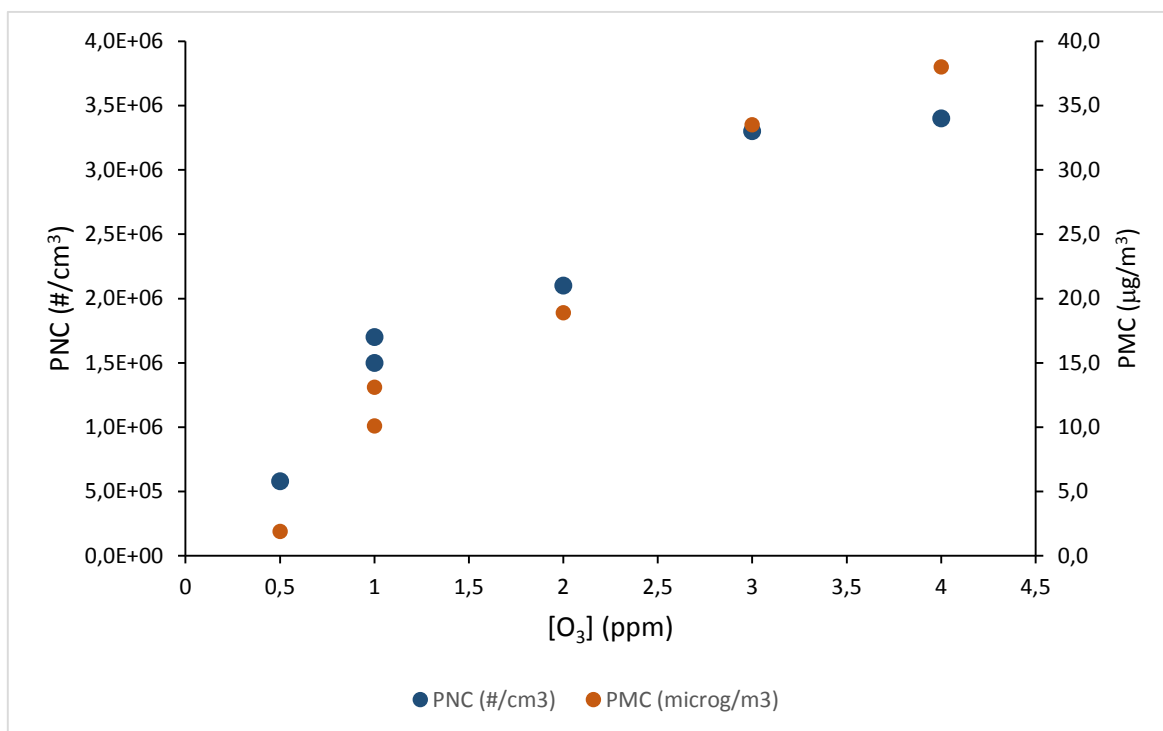

**Figure S10.** Maximum particle number concentration and maximum particle mass concentration in experiments carried out under different ozone concentrations and dry conditions. For this series of experiments, the initial concentrations of 2,3-DHF and SO<sub>2</sub> were 0.5ppm.

**Table ST1.** Effect of water vapour on the SOA production for the ozonolysis of 2,3-DHF. Initial concentrations of reactants and SOA data. PNC, PMC and diameter reported values are the maximum data registered for each magnitude during the experiment.

| 2,3-DHF<br>(ppm) | O <sub>3</sub><br>(ppm) | SO <sub>2</sub><br>(ppm) | HR<br>(%) | PNC<br>(#/cm <sup>3</sup> ) | PMC<br>(µg/m <sup>3</sup> ) | Diameter<br>(nm) |
|------------------|-------------------------|--------------------------|-----------|-----------------------------|-----------------------------|------------------|
| 0.5              | 1                       | 0                        | 20        | 3.9                         | 0                           | 0                |
| 0.5              | 1                       | 0                        | 50        | 38                          | 0                           | 0                |
| 0.5              | 1                       | 0                        | 5         | 6.7                         | 0                           | 0                |
| 0.5              | 1                       | 0                        | 50        | 13                          | 0                           | 0                |
| 0.5              | 1                       | 0.5                      | 0         | 1.70x10 <sup>6</sup>        | 10.1                        | 40               |
| 0.5              | 1                       | 0.5                      | 0         | 1.50x10 <sup>6</sup>        | 13.1                        | 50               |
| 0.5              | 1                       | 0.5                      | 15        | 1.25x10 <sup>6</sup>        | 9.1                         | 50               |
| 0.5              | 1                       | 0.5                      | 15        | 1.20x10 <sup>6</sup>        | 8.4                         | 40               |
| 0.5              | 1                       | 0.5                      | 29.2      | 8.50x10 <sup>5</sup>        | 4.8                         | 35               |
| 0.5              | 1                       | 0.5                      | 31.3      | 6,00x10 <sup>5</sup>        | 4.0                         | 35               |
| 0.5              | 1                       | 0.5                      | 50        | 6,50x10 <sup>5</sup>        | 3.1                         | 35               |
| 0.5              | 1                       | 0.5                      | 50.8      | 6,50x10 <sup>5</sup>        | 3                           | 35               |

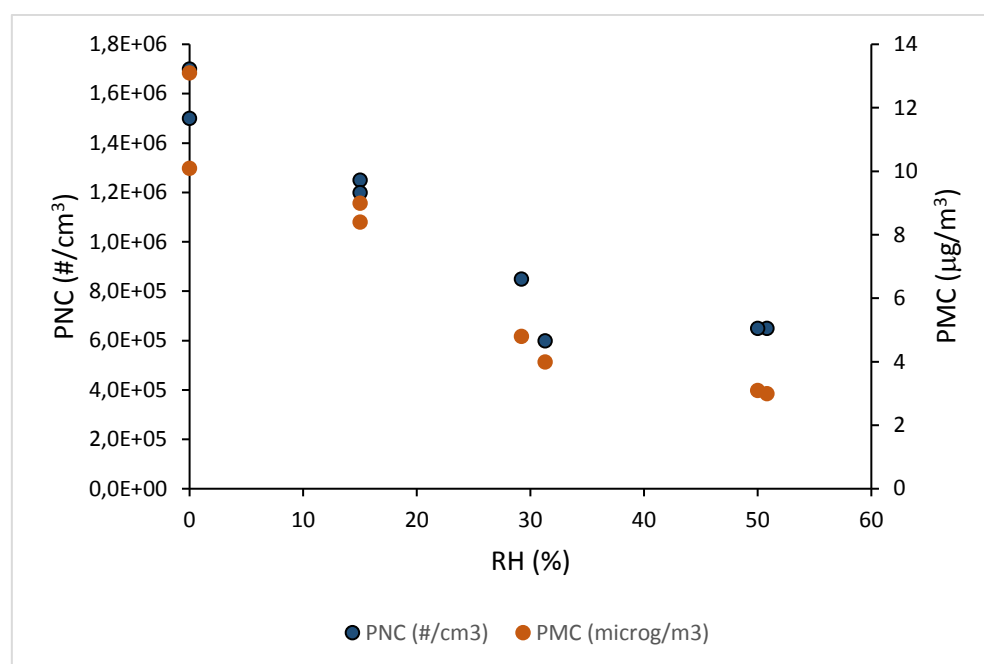

**Figure S11.** Effect of water vapour. Maximum particle number concentration and maximum particle mass concentration in experiments carried out under different RH. For this series of experiments, the initial concentrations of 2,3-DHF, ozone and SO<sub>2</sub> were 0.5, 1.0 and 0.5ppm, respectively.



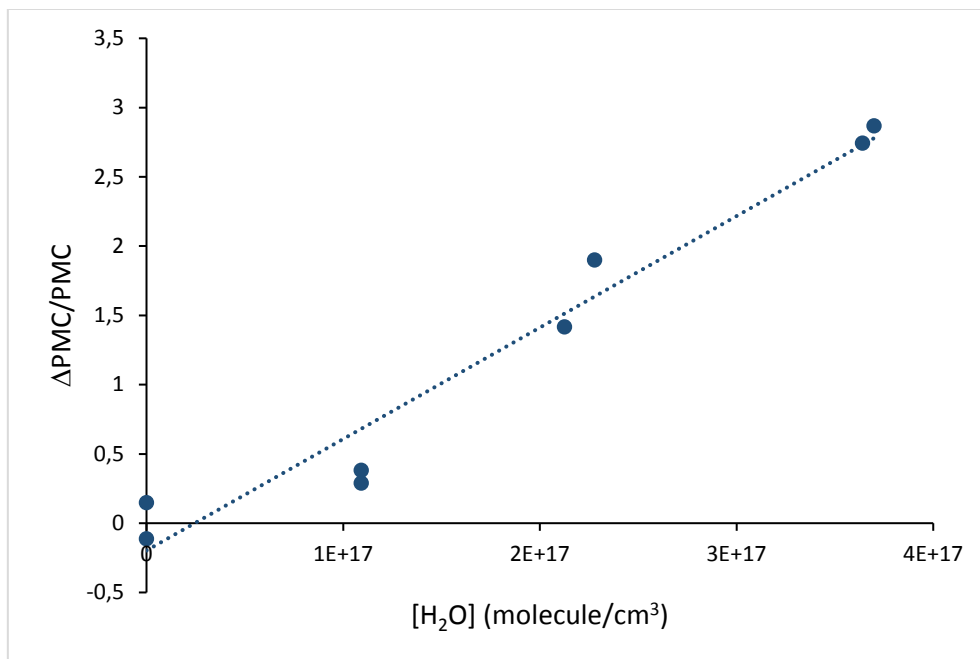

**Figure S12.** Decrease of the particle mass concentration with respect to the reference (dry) conditions over the actual PMC value for different water concentration. The SO<sub>2</sub> concentration for this series of experiments was  $1,2 \times 10^{13}$  molecule cm<sup>-3</sup>.

#### References:

Jayne, J. T., Po1schl, U., Chen, Y., Dai, D., Molina, L.T., Worsnop, D.R., Kolb, C.E., Molina, M. J.: Pressure and Temperature Dependence of the Gas-Phase Reaction of SO<sub>3</sub> with H<sub>2</sub>O and the Heterogeneous Reaction of SO<sub>3</sub> with H<sub>2</sub>O/H<sub>2</sub>SO<sub>4</sub> Surfaces. *J. Phys. Chem. A*, 101, 10000-10011, 1997.

Metzger, A., Verheggen, B., Dommen, J., Duplissy, J., Prevota, A. S. H., Weingartner, E., Riipinen, I., Kulmala, M., Spracklend, D. V., Carslaw, K. S., Baltensperger, U.: Evidence for the role of organics in aerosol particle formation under atmospheric conditions. *PNAS*. 107, 6646-6651, 2010.
